# Supplementary material for: Blood miRNomes and transcriptomes reveal novel longevity mechanisms in the long-lived bat, Myotis myotis
Source: PubMed Central journal article supplement (PMC5103334; doi:10.1186/s12864-016-3227-8), 2016-11-10
Supplement: 12864_2016_3227_MOESM2_ESM.pdf [file 12864_2016_3227_MOESM2_ESM.pdf]

**Figure S1.** The number of homology of *M. myotis* mature miRNA to the customized bat miRNA database.

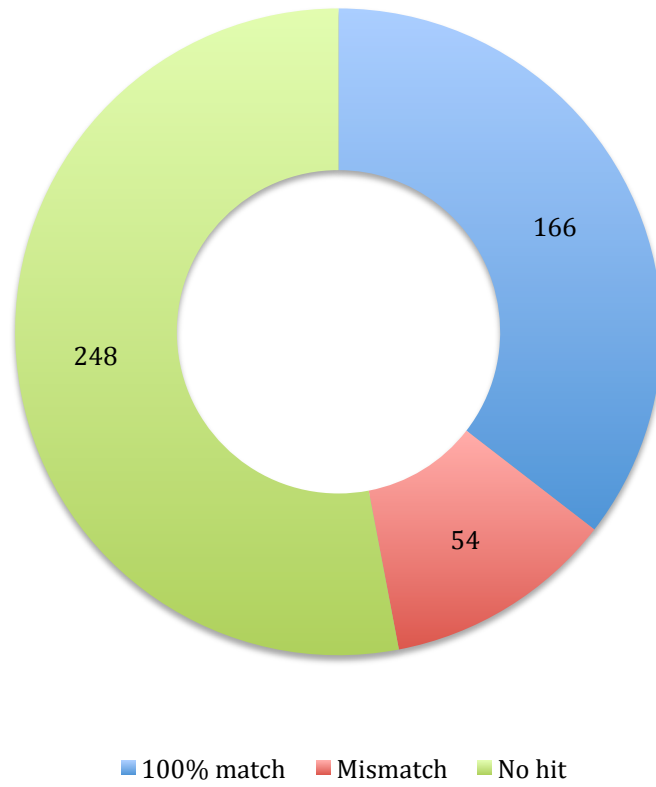

**Text S1.** The supporting references for the bioprocesses that 6 DE miRNA are involved in.

**miR-101-3p** [1-3]

**miR-16-5p** [4, 5]

**miR-143-3p** [6-9]

**miR-155-5p** [10, 11]

**miR-125-5p** [12, 13]

**miR-221-5p** [14, 15]

1. Shen Q, Bae HJ, Eun JW, Kim HS, Park SJ, Shin WC, Lee EK, Park S, Park WS, Lee JY: **MiR-101 functions as a tumor suppressor by directly targeting nemo-like kinase in liver cancer.** *Cancer letters* 2014, **344**:204-211.
2. Hao Y, Gu X, Zhao Y, Greene S, Sha W, Smoot DT, Califano J, Wu TC, Pang X: **Enforced expression of miR-101 inhibits prostate cancer cell growth by modulating the COX-2 pathway in vivo.** *Cancer Prevention Research* 2011, **4**:1073-1083.
3. Wang L, Li L, Guo R, Li X, Lu Y, Guan X, Gitau SC, Xu C, Yang B, Shan H: **miR-101 promotes breast cancer cell apoptosis by targeting Janus kinase 2.** *Cellular Physiology and Biochemistry* 2014, **34**:413-422.
4. Bonci D, Coppola V, Musumeci M, Addario A, Giuffrida R, Memeo L, D'Urso L, Pagliuca A, Biffoni M, Labbaye C: **The miR-15a-miR-16-1 cluster controls prostate cancer by targeting multiple oncogenic activities.** *Nature medicine* 2008, **14**:1271-1277.
5. Pekarsky Y, Croce CM: **Role of miR-15/16 in CLL.** *Cell Death & Differentiation* 2015, **22**:6-11.
6. Hu Y, Ou Y, Wu K, Chen Y, Sun W: **miR-143 inhibits the metastasis of pancreatic cancer and an associated signaling pathway.** *Tumor Biology* 2012, **33**:1863-1870.
7. Ansari MH, Irani S, Edalat H, Amin R, Roushandeh AM: **Deregulation of miR-93 and miR-143 in human esophageal cancer.** *Tumor Biology* 2015:1-7.
8. Kent OA, McCall MN, Cornish TC, Halushka MK: **Lessons from miR-143/145: the importance of cell-type localization of miRNAs.** *Nucleic acids research* 2014, **42**:7528-7538.
9. Zhang N, Su Y, Xu L: **Targeting PKC $\epsilon$  by miR-143 regulates cell**

- apoptosis in lung cancer.** *FEBS letters* 2013, **587**:3661-3667.
10. Faraoni I, Antonetti FR, Cardone J, Bonmassar E: **miR-155 gene: a typical multifunctional microRNA.** *Biochimica et Biophysica Acta (BBA)-Molecular Basis of Disease* 2009, **1792**:497-505.
  11. Li S, Chen T, Zhong Z, Wang Y, Li Y, Zhao X: **microRNA-155 silencing inhibits proliferation and migration and induces apoptosis by upregulating BACH1 in renal cancer cells.** *Molecular medicine reports* 2012, **5**:949-954.
  12. Sun Y-M, Lin K-Y, Chen Y-Q: **Diverse functions of miR-125 family in different cell contexts.** *J Hematol Oncol* 2013, **6**.
  13. Pan W, Zhu S, Dai D, Liu Z, Li D, Li B, Gagliani N, Zheng Y, Tang Y, Weirauch MT: **MiR-125a targets effector programs to stabilize Treg-mediated immune homeostasis.** *Nature communications* 2015, **6**.
  14. Garofalo M, Quintavalle C, Romano G, Croce CM, Condorelli G: **miR221/222 in cancer: their role in tumor progression and response to therapy.** *Curr Mol Med* 2012, **12**:27-33.
  15. Shah MY, Calin GA: **MicroRNAs miR-221 and miR-222: a new level of regulation in aggressive breast cancer.** *Genome Med* 2011, **3**:56.
